# Supplementary material for: Structural and functional characterization of an otopetrin family proton channel
Source: eLife journal article supplement (doi:10.7554/elife.46710), 2019-04-11
Supplement: supp [file elife-46710-supp-v1.zip]

Archive with 12 entries (12 files):
- elife_poa_e46710_Figure_1_source_data_1.pptx
- elife_poa_e46710_Figure_2_source_data_1.docx
- elife_poa_e46710_Figure_4_figure_supplement_1.tif
- elife_poa_e46710_Figure_2_figure_supplement_2.tif
- elife_poa_e46710_Figure_4_figure_supplement_2.tif
- elife_poa_e46710_Figure_2_figure_supplement_1.tif
- elife_poa_e46710_Figure_2_figure_supplement_4.tif
- elife_poa_e46710_Figure_3_source_data_1.pptx
- elife_poa_e46710_Figure_4_source_data_1.pptx
- elife_poa_e46710_Figure_2_figure_supplement_3.tif
- elife_poa_e46710_Transparent_Reporting_File.pdf
- elife_poa_e46710_Figure_1_figure_supplement_1.tif
