# Supplementary material for: Structural and functional characterization of an otopetrin family proton channel
Source: eLife journal article supplement (doi:10.7554/elife.46710), 2019-04-11
Supplement: supp [file elife-46710-supp-v1.zip › elife_poa_e46710_Figure_2_source_data_1.docx]

**Figure 2-source data 1. Cryo-EM data collection, refinement and validation statistics**
