# Supplementary figures and images for: Structural and functional characterization of an otopetrin family proton channel
Source: eLife journal article supplement (doi:10.7554/elife.46710), 2019-04-11

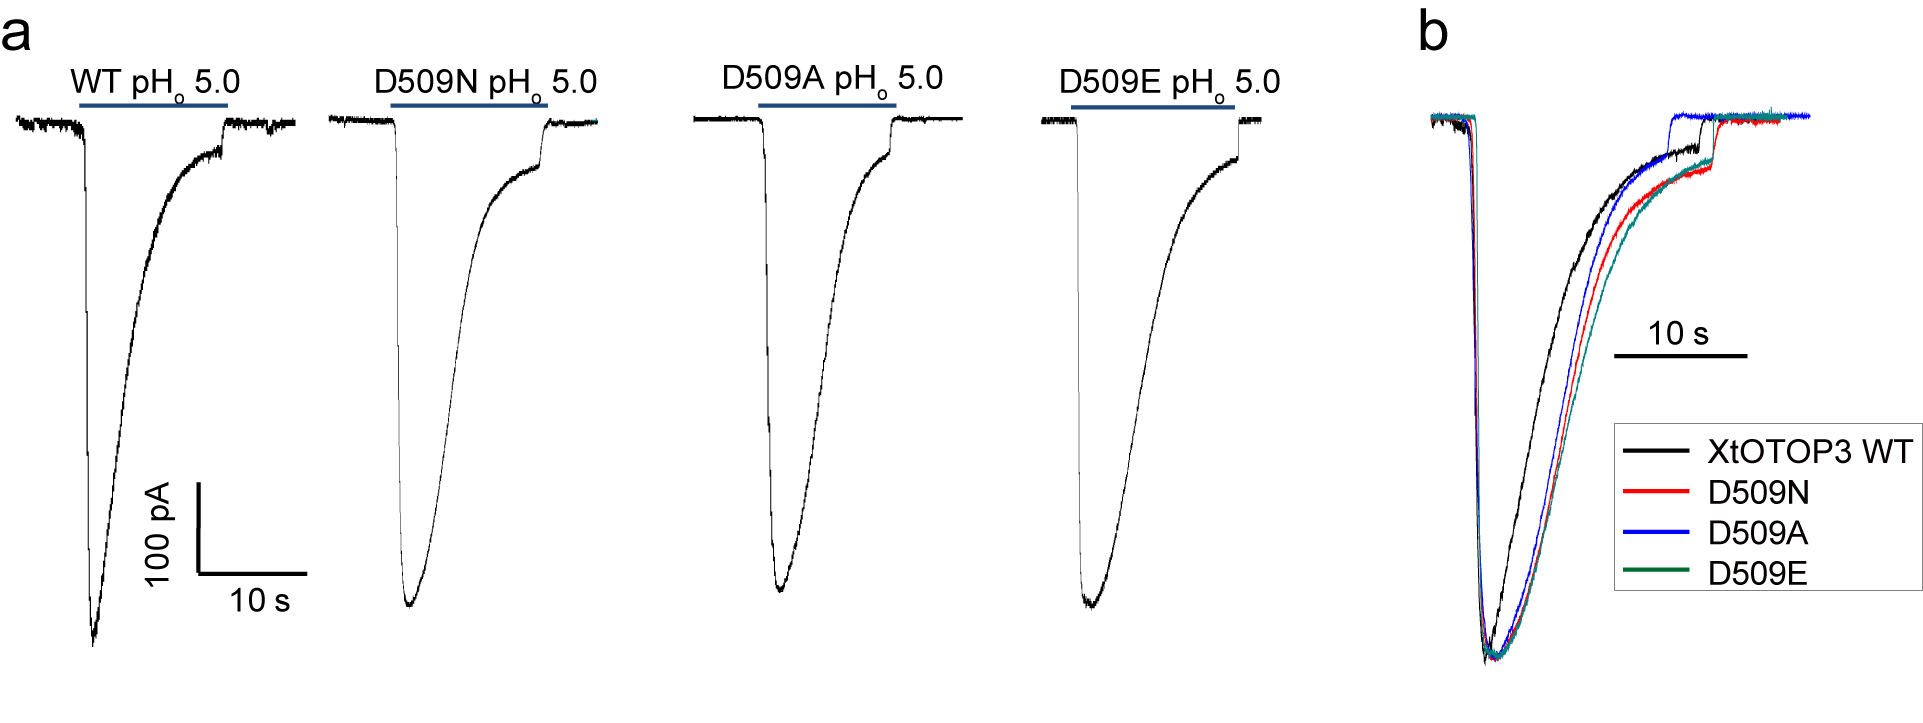

Supplement: supp [file elife-46710-supp-v1.zip › elife_poa_e46710_Figure_4_figure_supplement_1.tif]

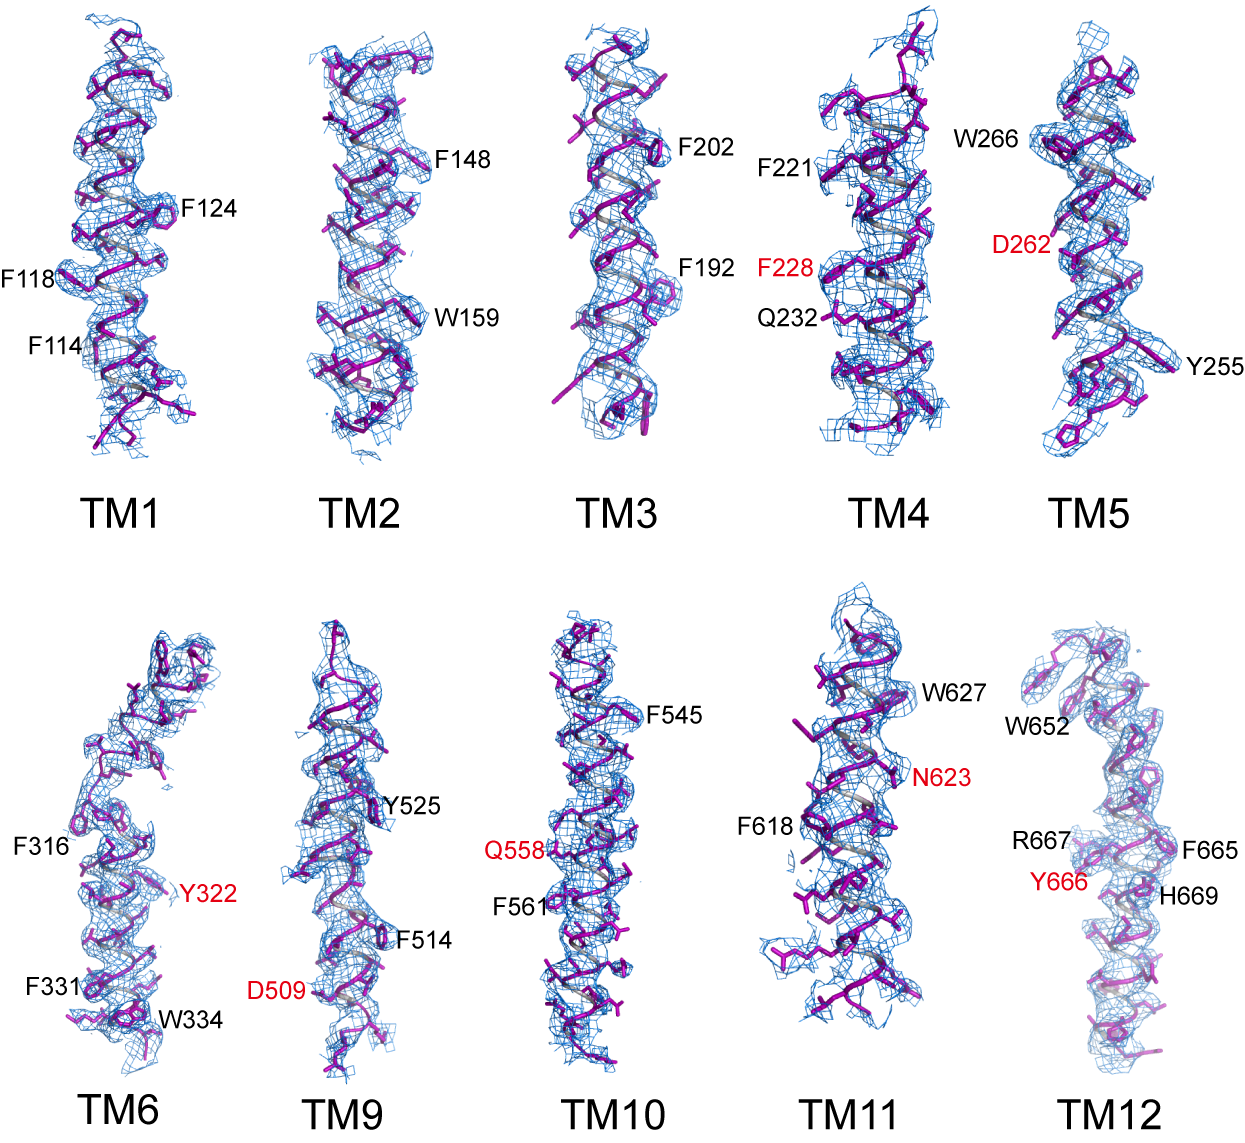

Supplement: supp [file elife-46710-supp-v1.zip › elife_poa_e46710_Figure_2_figure_supplement_2.tif]

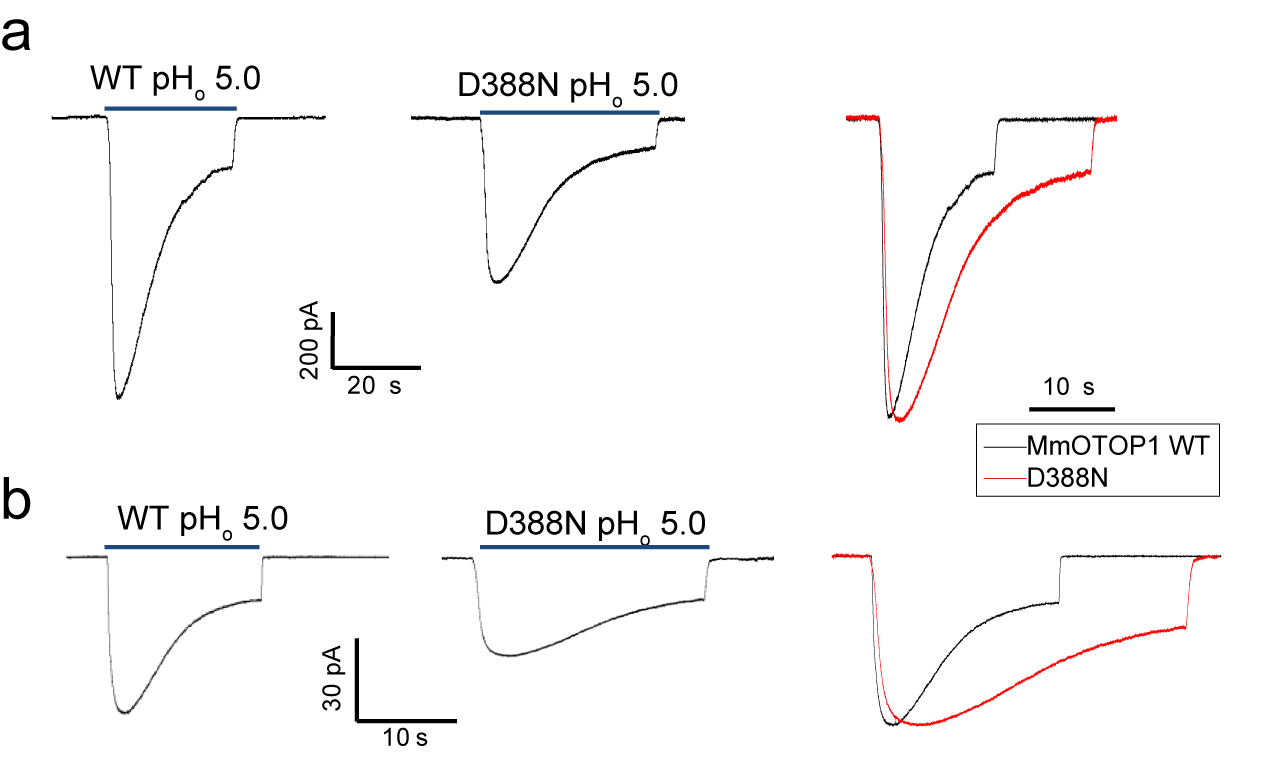

Supplement: supp [file elife-46710-supp-v1.zip › elife_poa_e46710_Figure_4_figure_supplement_2.tif]

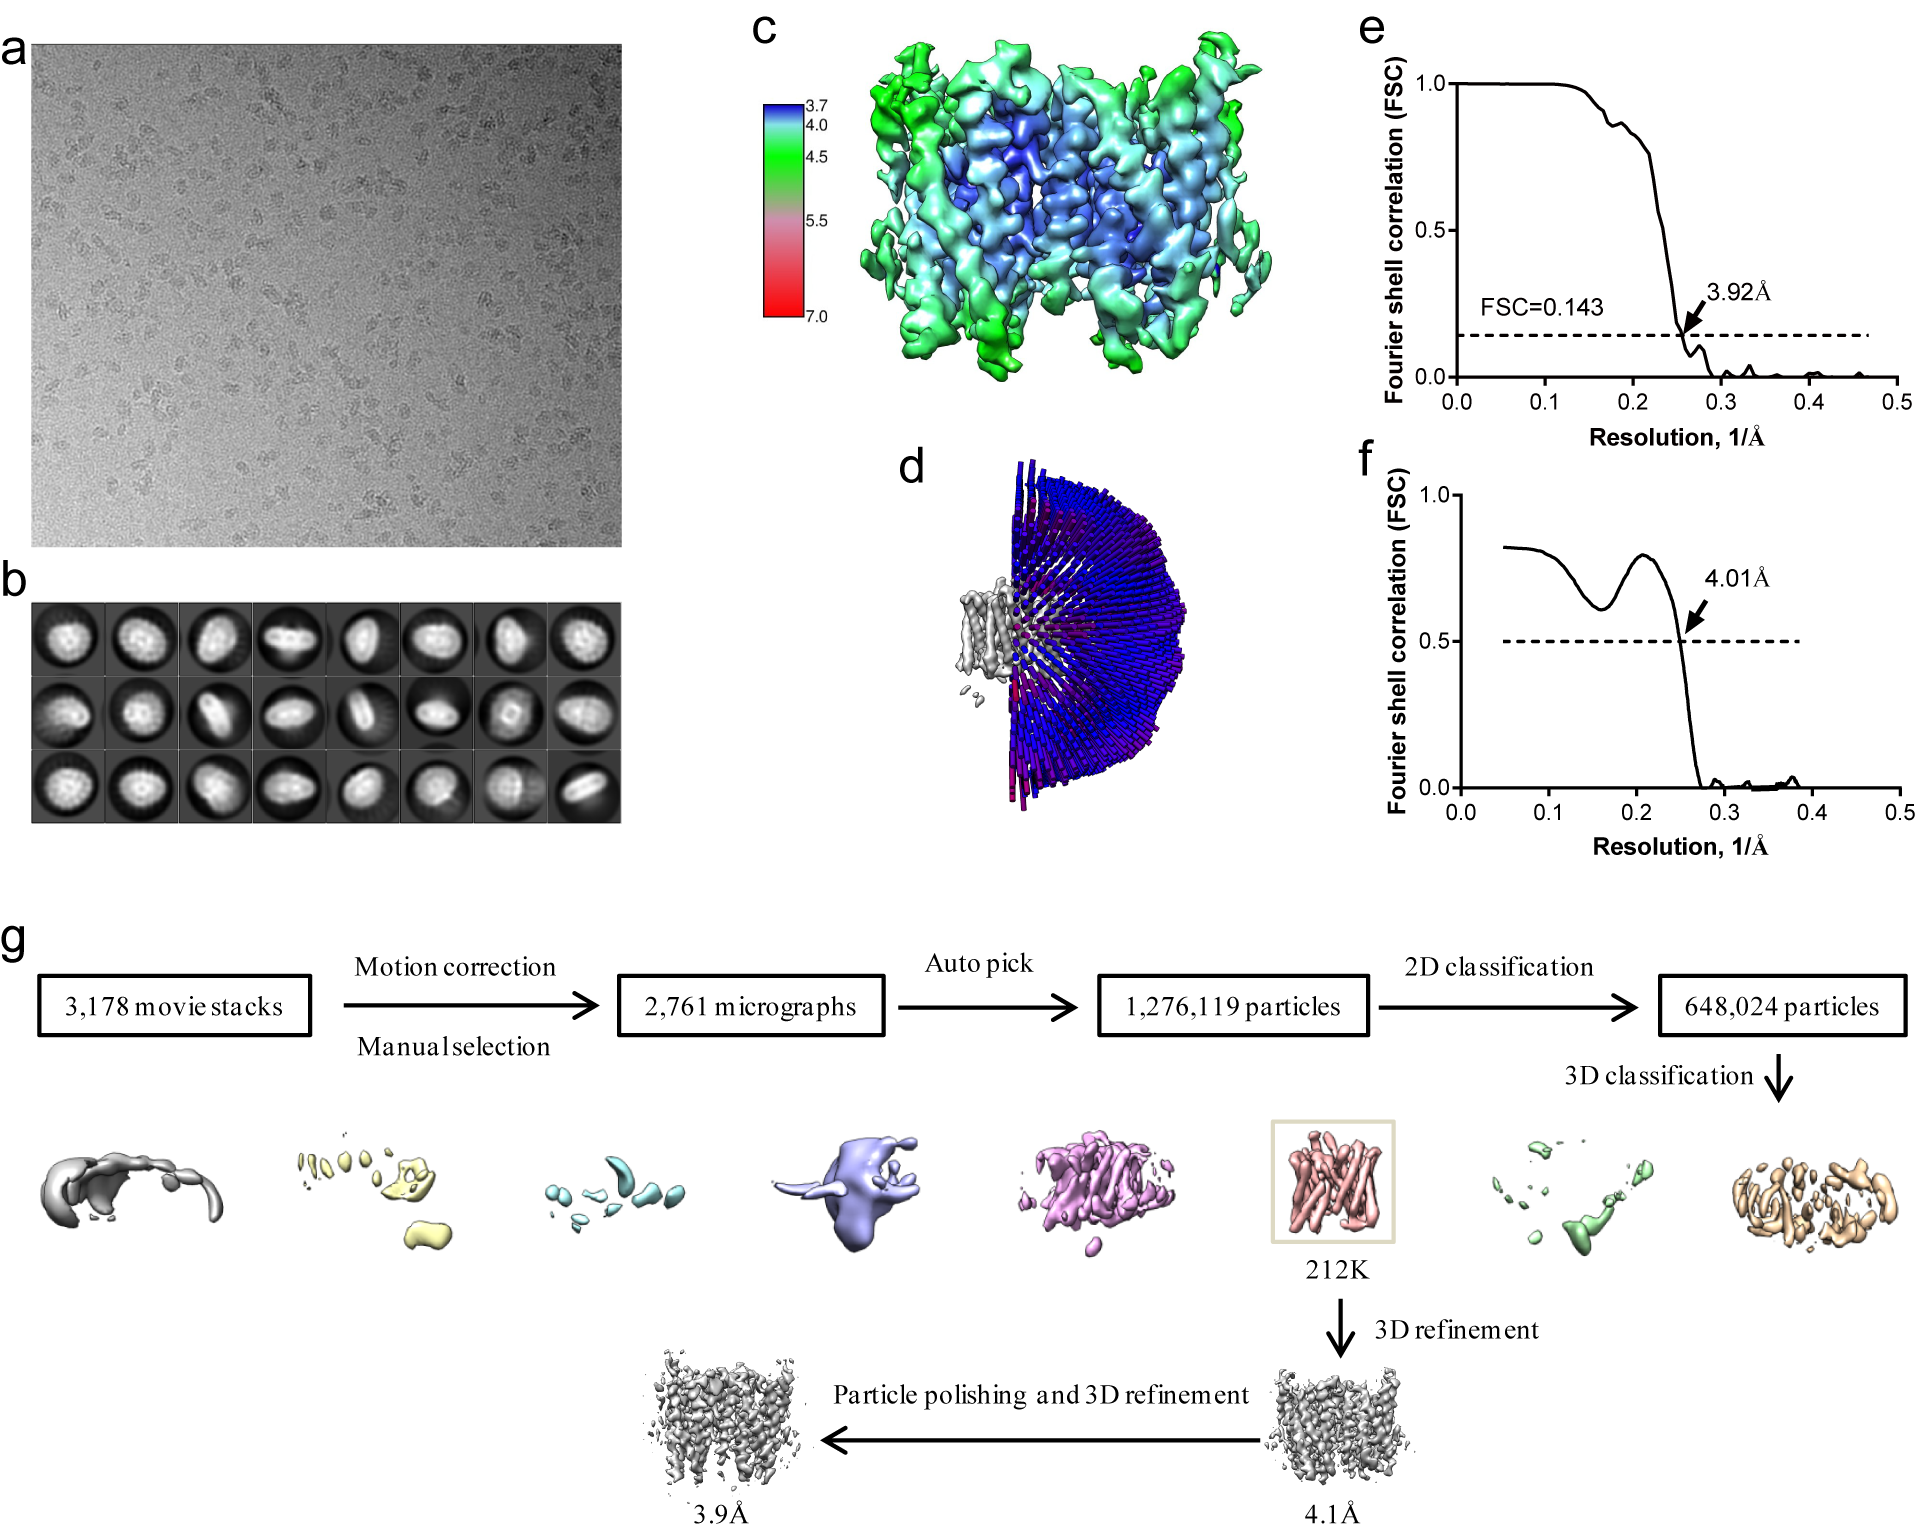

Supplement: supp [file elife-46710-supp-v1.zip › elife_poa_e46710_Figure_2_figure_supplement_1.tif]

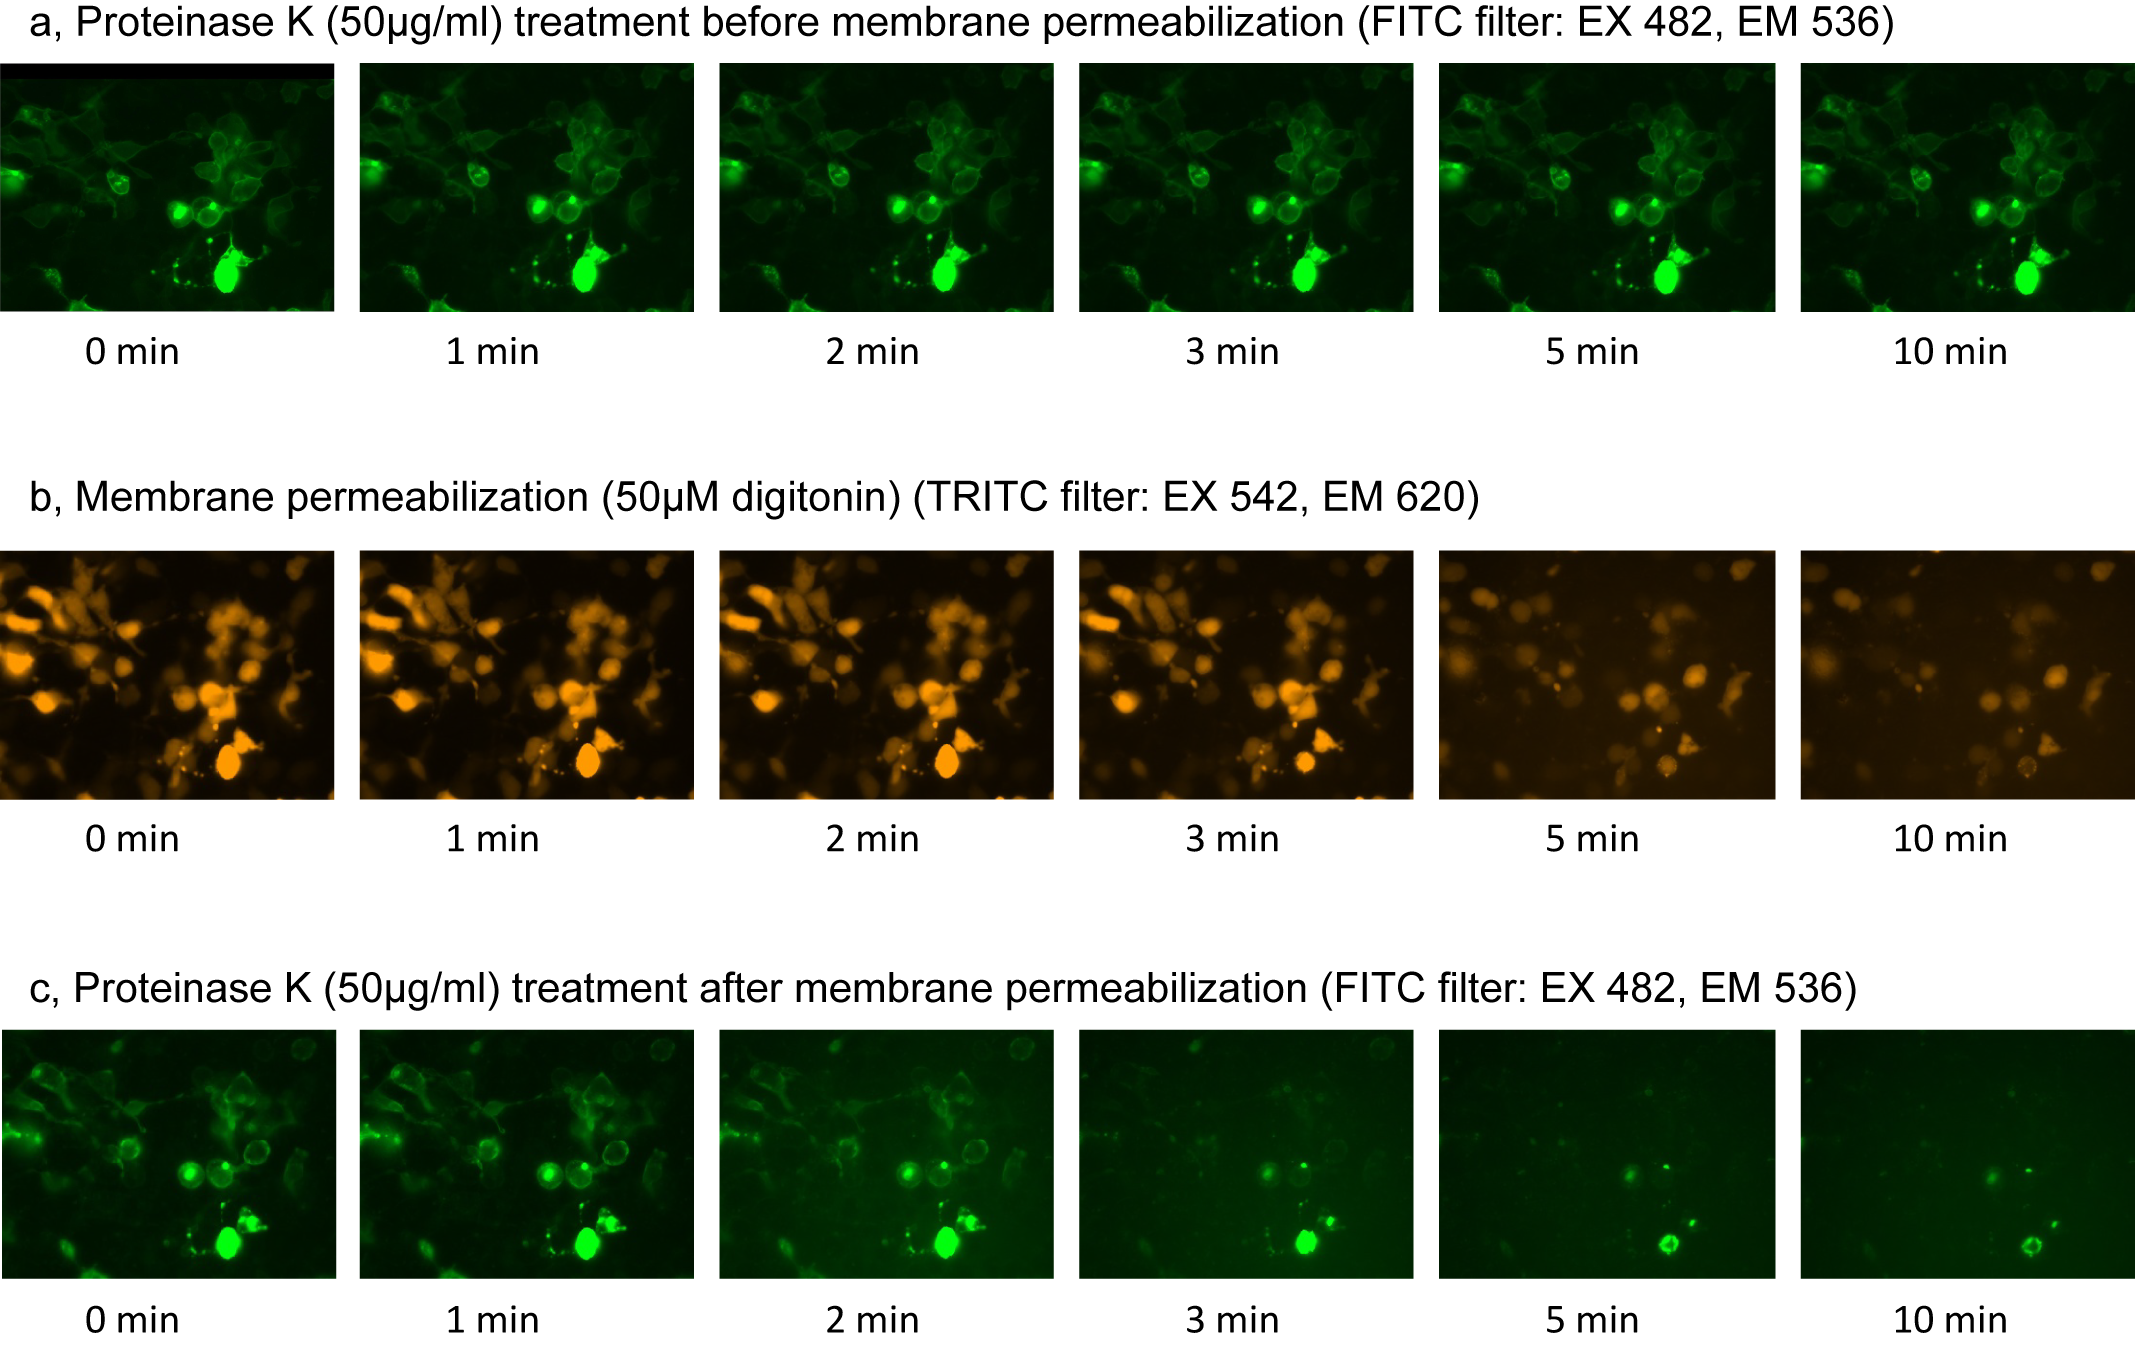

Supplement: supp [file elife-46710-supp-v1.zip › elife_poa_e46710_Figure_2_figure_supplement_4.tif]

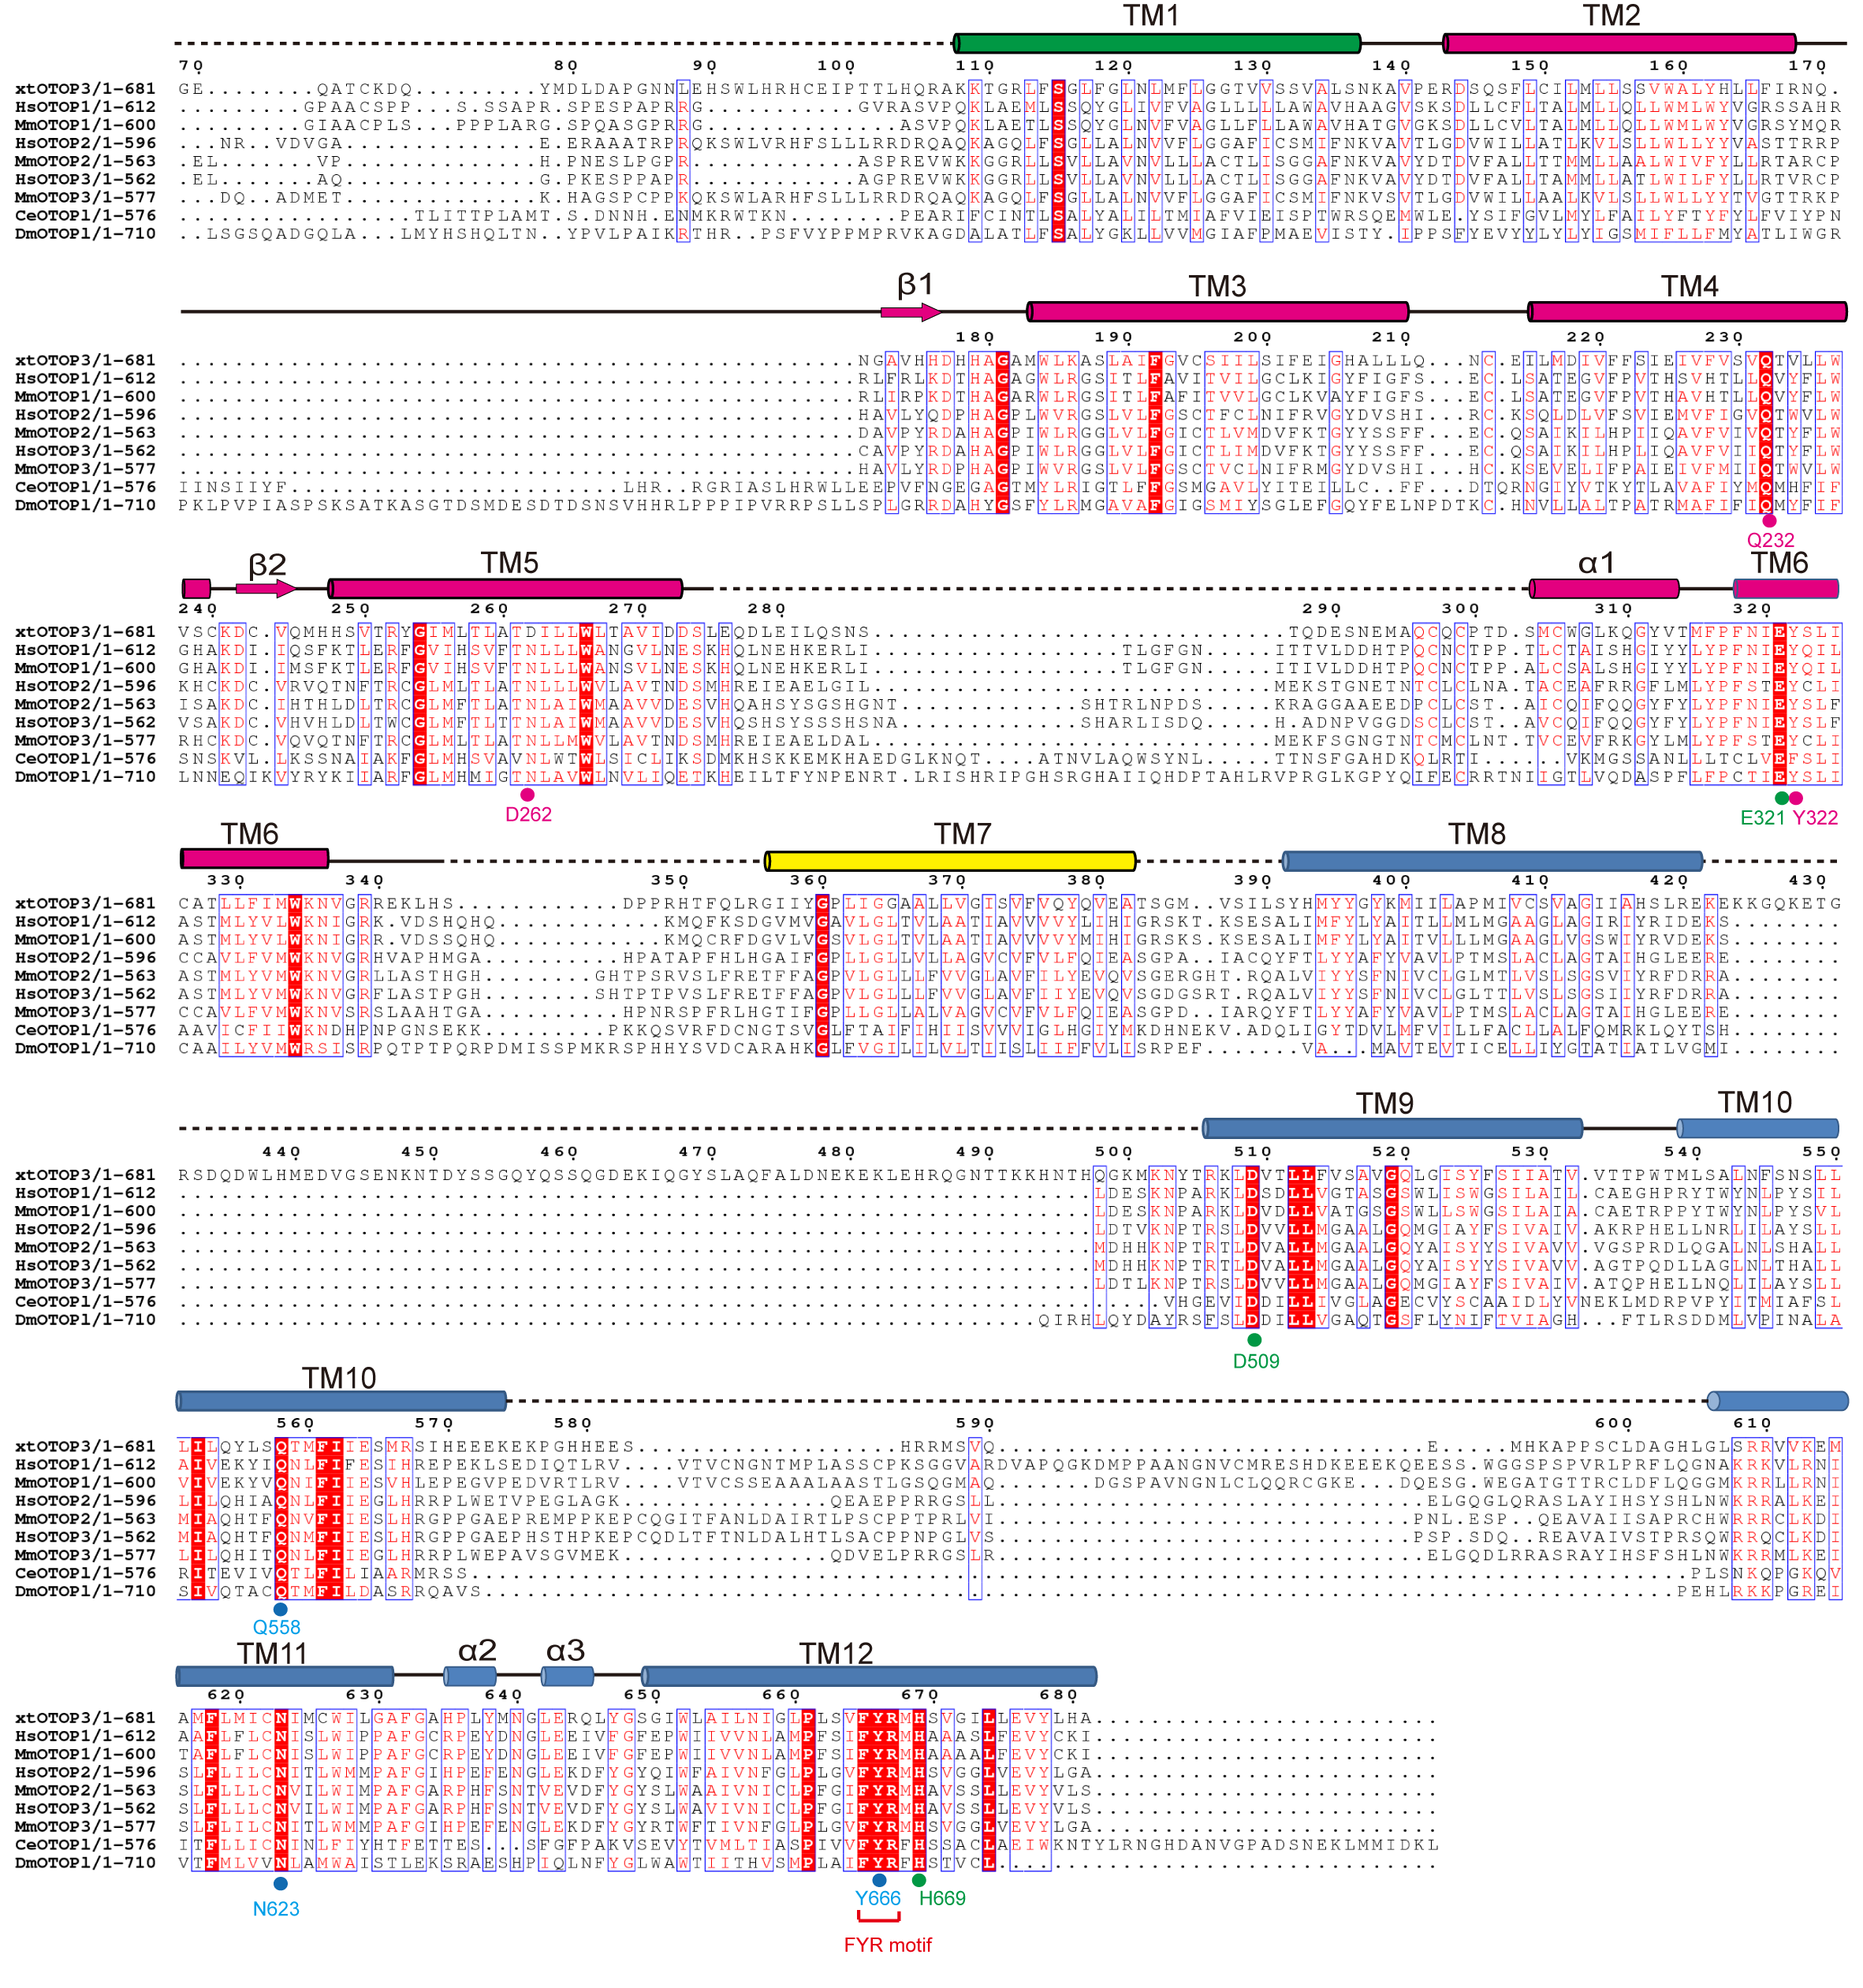

Supplement: supp [file elife-46710-supp-v1.zip › elife_poa_e46710_Figure_2_figure_supplement_3.tif]

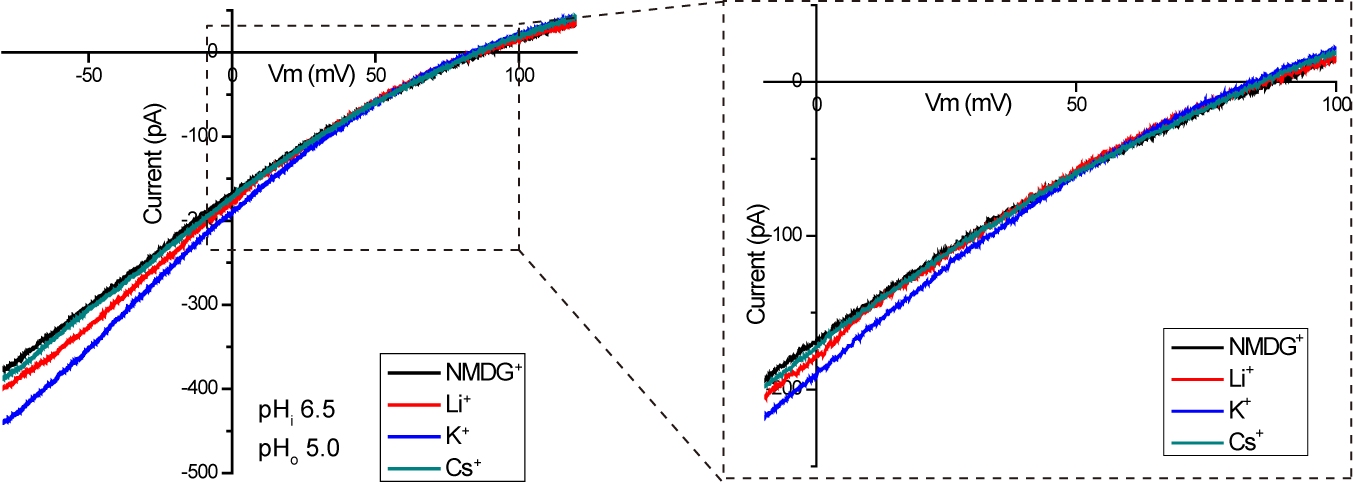

Supplement: supp [file elife-46710-supp-v1.zip › elife_poa_e46710_Figure_1_figure_supplement_1.tif]
